# Supplementary material for: TiO2 nanocrystal embedded ordered mesoporous carbons as anode materials for lithium-ion batteries with highly reversible capacity and rate performance
Source: Royal Society of Chemistry journal article supplement (doi:10.1039/c3ce40642c), 2013-01-01

## Supporting information

**Materials Preparation.** Anatase  $\text{TiO}_2$  polycrystal structure was prepared by solvothermal processing, and the cetyltrimethylammonium bromide (CTAB) used as dispersing agent. In a typically synthesis, a desired amount of CTAB anhydrous ethanol was ultrasonically dispersed in 15ml of anhydrous ethanol before cetyltrimethylammonium bromide (CTAB) was added with magnetic stirring at room temperature for 1 h. Then 0.2 M anhydrous ethanol solution of tetrabutyl titanate was added and dissolved with stirring, forming the mixed solution with mole ratio of Ti : CTAB was 1: 0.31. Ammonia was added dropwise to adjust the pH value to 8.5. After stirring for 0.5 h, the resulting suspension was transferred to a 50ml Teflon-lined autoclave and heated at 180 °C for 12 h. The product was filtered, washed with deionized water and anhydrous ethanol respectively, and dried at 60 °C overnight.

**Materials Characterization.** The shape and crystal structure of the resulting anatase  $\text{TiO}_2$  were investigated by X-ray spectroscopy (XRD, Philips Rigaku D/Max-ka X-ray diffractometer equipped with a Cu-Ka source at 40 kV and 30 mA). The morphologies of the samples were investigated by using SU-70 field-emission scanning electron microscopy (FE-SEM ) and the transmission electron microscope (TEM) images were obtained in Tecnai 20U-Twin at an acceleration voltage of 200 kV. The mogravimetric analysis (TGA) was performed in air with a heating rate of 10 °C/min<sup>-1</sup> by using thermogravimetric analyzer (TG-209C), it is performed to measure the weight content of the carbon.

**Electrochemical Measurements.** The electrochemical tests were performed using two-electrode Swagelok-type cells with lithium tablets serving as both the counter and reference electrodes under ambient temperature. The working electrode was composed of 70 wt % of  $\text{TiO}_2$  polycrystal crystals active material, 10 wt % of carbon black conductivity agent and 20 wt % of polyvinylidene difluoride binder (PVDF). 1 mol L<sup>-1</sup>  $\text{LiPF}_6$  solution in a mixture of ethylene carbonate (EC) and dimethyl carbonate (DMC) (EC : DEC, 1 : 1 by volume) was used electrolyte. Cell assembly was carried out in an Argon-filled glovebox with both moisture and oxygen contents below 1 ppm. Galvanostatic charge/discharge was conducted using a battery tester (NEWAER) with voltage window 1 V-3 V at a current density of 100 mA g<sup>-1</sup>.

## Figure captions

Figure. S1 XRD pattern of the  $\text{TiO}_2$  samples.

Figure. S2 SEM images of the  $\text{TiO}_2$  samples.

Figure. S3 the charge-discharge capacities curves of the  $\text{TiO}_2$  samples.

Figure. S4 the coulombic efficiency curve of the  $\text{TiO}_2$  samples.

Figure. S5 the rate performance curve of the  $\text{TiO}_2$  samples.

Figure. S6 TGA curve of the  $\text{OMCT}_5$  and  $\text{OMCT}_{15}$  samples under air atmosphere at a rate of  $10\text{ }^\circ\text{C min}^{-1}$  from  $30\text{ }^\circ\text{C}$  to  $800\text{ }^\circ\text{C}$ .

Figure. S7 SEM images of the electrodes after 5 cycling (a), 10 cycling (b) at a current of  $100\text{ mA g}^{-1}$

Figure. S1

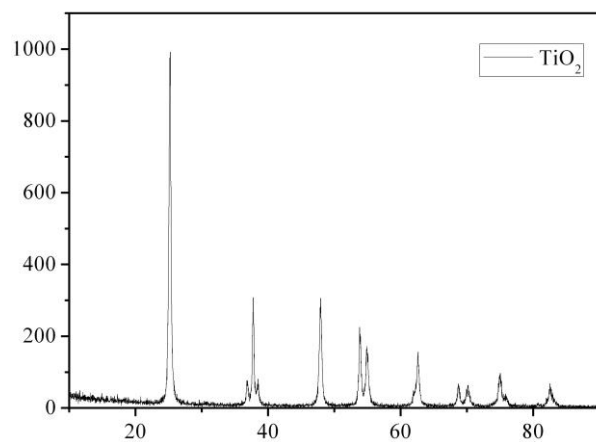

Figure. S2

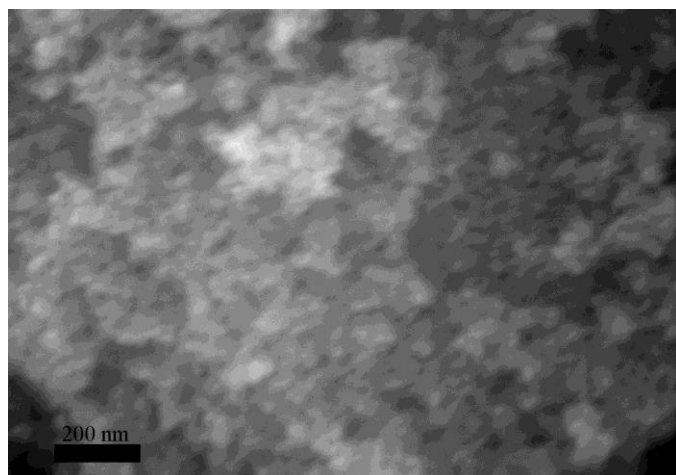

Figure. S3

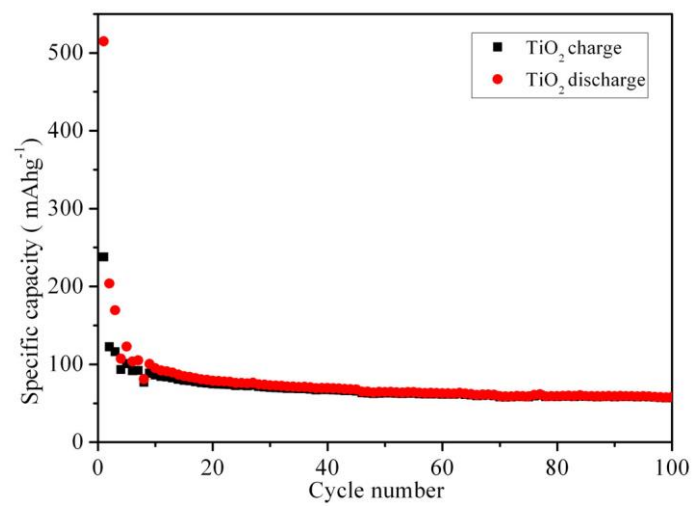

Figure. S4

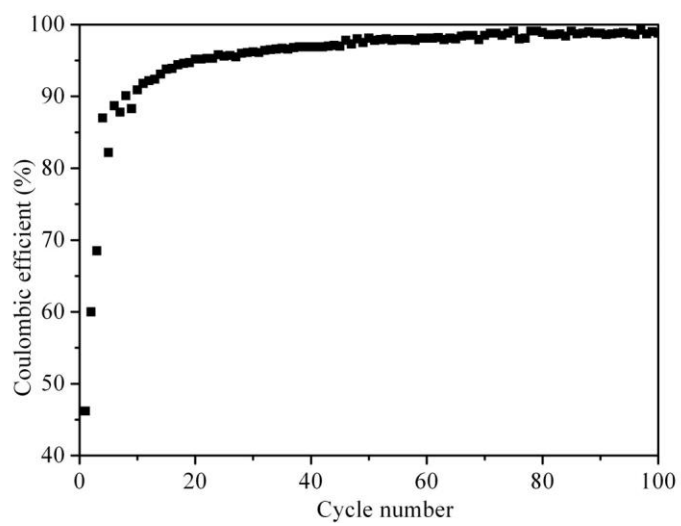

Figure. S5

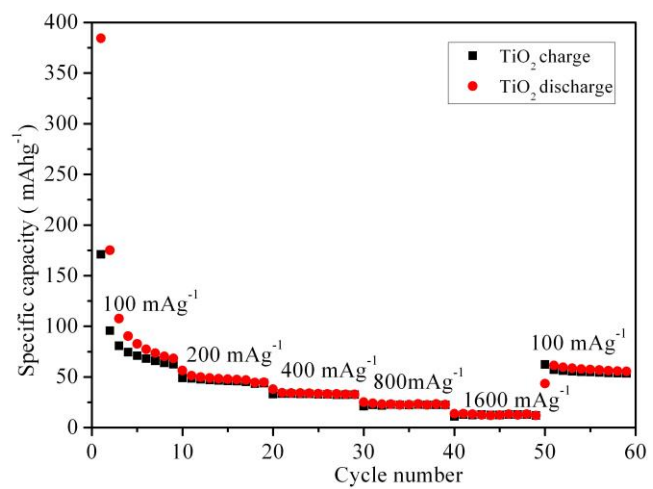

Figure. S6

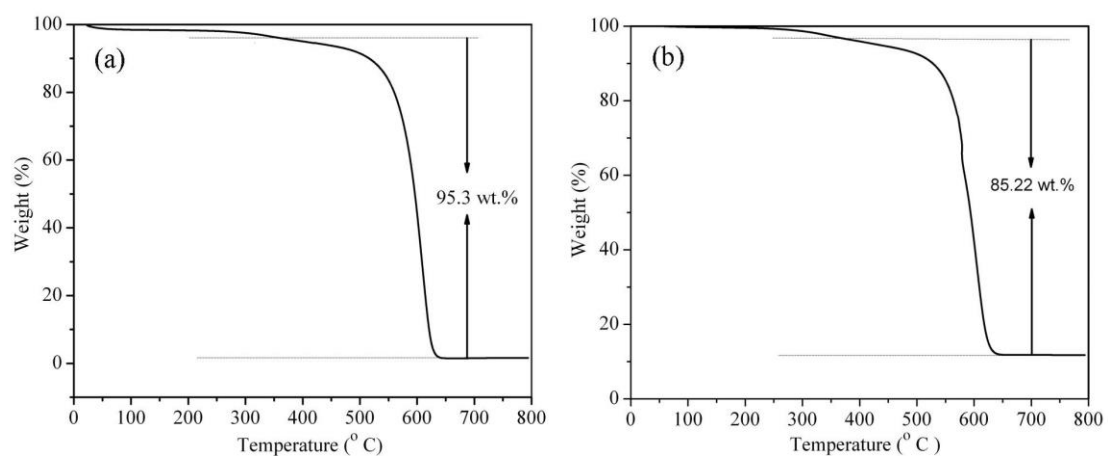

Figure. S7

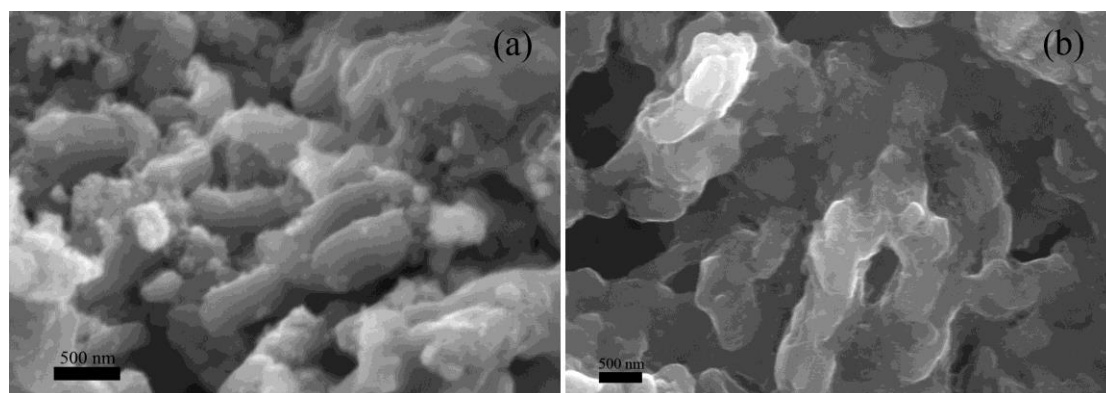

Supplement: c3ce40642c.pdf [file c3ce40642c.pdf]
